# Supplementary material for: Manipulation of birefringence via substitution of Sr2+by Pb2+based on the structure model of LiSr1−xPbxBO3(0 ≤ x ≤ 0.5)
Source: Royal Society of Chemistry journal article supplement (doi:10.1039/c6nj00390g), 2016-01-01

## Supporting Information

### **Manipulation of Birefringence via Substitution of Sr<sup>2+</sup> by Pb<sup>2+</sup> Based on the Structure Model of LiSr<sub>1-x</sub>Pb<sub>x</sub>BO<sub>3</sub> (0 ≤ x ≤ 0.5)**

Miriding Mutailipu,<sup>†, §</sup> Dianwei Hou,<sup>†, §</sup> Min Zhang,<sup>\*, †</sup> Zhihua Yang,<sup>†</sup>

Shilie Pan,<sup>\*, †</sup>

<sup>†</sup>Key Laboratory of Functional Materials and Devices for Special Environments,  
Xinjiang Technical Institute of Physics & Chemistry, and Xinjiang Key Laboratory of  
Electronic Information Materials and Devices, Chinese Academy of Sciences, 40-1  
South Beijing 7 Road, Urumqi 830011, China

<sup>§</sup>University of the Chinese Academy of Sciences, Beijing 100049, China

\*Corresponding authors, E-mails: zhangmin@ms.xjb.ac.cn; span@ms.xjb.ac.cn

## CONTENTS

- 1. Table S1** Selected bond lengths ( $\text{\AA}$ ) for  $\text{LiSr}_{1-x}\text{Pb}_x\text{BO}_3$  ( $x = 0.138, 0.285, 0.320, 0.379, 0.417, 0.5$ )
- 2. Table S2** Atom-cutting analysis and calculated birefringence at 1064nm for  $\text{LiSrBO}_3$  and  $\text{LiSr}_{0.5}\text{Pb}_{0.5}\text{BO}_3$
- 3. Figure S1** XRD patterns of calculated and experimental for crystals  $\text{LiSr}_{1-x}\text{Pb}_x\text{BO}_3$  ( $x = 0.138, 0.285, 0.320, 0.379, 0.417, 0.5$ ).
- 4. Figure S2** The calculated birefringence of  $\text{LiSrBO}_3$  and  $\text{LiSr}_{0.5}\text{Pb}_{0.5}\text{BO}_3$

**Table S1** Selected bond lengths (Å) for  $\text{LiSr}_{1-x}\text{Pb}_x\text{BO}_3$  ( $x=0.138, 0.285, 0.320, 0.379, 0.417, 0.5$ )

| Bond                                                                | Bond Lengths | Bond                     | bond lengths |
|---------------------------------------------------------------------|--------------|--------------------------|--------------|
| <b><math>\text{LiSr}_{0.862}\text{Pb}_{0.138}\text{BO}_3</math></b> |              |                          |              |
| Sr(1)/Pb(1)-O(1) <sup>#1</sup>                                      | 2.471(7)     | Li(1)-O(2) <sup>#5</sup> | 1.941(13)    |
| Sr(1)/Pb(1)-O(2)                                                    | 2.523(7)     | Li(1)-O(3)               | 1.965(13)    |
| Sr(1)/Pb(1)-O(2) <sup>#2</sup>                                      | 2.531(7)     | Li(1)-O(3) <sup>#8</sup> | 2.010(14)    |
| Sr(1)/Pb(1)-O(3) <sup>#3</sup>                                      | 2.538(8)     | Li(1)-O(2)               | 2.137(13)    |
| Sr(1)/Pb(1)-O(1) <sup>#4</sup>                                      | 2.543(6)     | Li(1)-O(1) <sup>#8</sup> | 2.164(13)    |
| Sr(1)/Pb(1)-O(1)                                                    | 2.696(7)     | B(1)-O(1)                | 1.369(9)     |
| Sr(1)/Pb(1)-O(3) <sup>#7</sup>                                      | 2.828(8)     | B(1)-O(3)                | 1.371(10)    |
|                                                                     |              | B(1)-O(2)                | 1.379(9)     |
| <b><math>\text{LiSr}_{0.715}\text{Pb}_{0.285}\text{BO}_3</math></b> |              |                          |              |
| Sr(1)/Pb(1)-O(1) <sup>#1</sup>                                      | 2.441(6)     | Li(1)-O(3)               | 1.934(13)    |
| Sr(1)/Pb(1)-O(2)                                                    | 2.513(6)     | Li(1)-O(2) <sup>#5</sup> | 1.968(15)    |
| Sr(1)/Pb(1)-O(1) <sup>#2</sup>                                      | 2.560(5)     | Li(1)-O(3) <sup>#8</sup> | 1.995(12)    |
| Sr(1)/Pb(1)-O(3) <sup>#3</sup>                                      | 2.568(6)     | Li(1)-O(1) <sup>#8</sup> | 2.158(15)    |
| Sr(1)/Pb(1)-O(2) <sup>#4</sup>                                      | 2.582(5)     | Li(1)-O(2)               | 2.185(15)    |
| Sr(1)/Pb(1)-O(1)                                                    | 2.712(6)     | B(1)-O(3)                | 1.354(11)    |
| Sr(1)/Pb(1)-O(3) <sup>#7</sup>                                      | 2.977(9)     | B(1)-O(2)                | 1.362(10)    |
|                                                                     |              | B(1)-O(1)                | 1.393(10)    |
| <b><math>\text{LiSr}_{0.680}\text{Pb}_{0.320}\text{BO}_3</math></b> |              |                          |              |
| Sr(1)/Pb(1)-O(1) <sup>#1</sup>                                      | 2.411(7)     | Li(1)-O(2) <sup>#5</sup> | 1.920(17)    |
| Sr(1)/Pb(1)-O(2)                                                    | 2.503(7)     | Li(1)-O(3)               | 1.974(19)    |
| Sr(1)/Pb(1)-O(1) <sup>#2</sup>                                      | 2.543(7)     | Li(1)-O(3) <sup>#8</sup> | 1.977(16)    |
| Sr(1)/Pb(1)-O(3) <sup>#3</sup>                                      | 2.603(9)     | Li(1)-O(2)               | 2.16(2)      |
| Sr(1)/Pb(1)-O(2) <sup>#4</sup>                                      | 2.612(6)     | Li(1)-O(1) <sup>#8</sup> | 2.21(2)      |
| Sr(1)/Pb(1)-O(1)                                                    | 2.726(7)     | B(1)-O(3)                | 1.339(17)    |
| Sr(1)/Pb(1)-O(3) <sup>#7</sup>                                      | 3.045(14)    | B(1)-O(1)                | 1.368(12)    |
|                                                                     |              | B(1)-O(2)                | 1.376(14)    |
| <b><math>\text{LiSr}_{0.621}\text{Pb}_{0.371}\text{BO}_3</math></b> |              |                          |              |
| Sr(1)/Pb(1)-O(1) <sup>#1</sup>                                      | 2.421(7)     | Li(1)-O(3)               | 1.92(2)      |
| Sr(1)/Pb(1)-O(2)                                                    | 2.491(8)     | Li(1)-O(2) <sup>#5</sup> | 1.977(18)    |
| Sr(1)/Pb(1)-O(1) <sup>#2</sup>                                      | 2.547(7)     | Li(1)-O(3) <sup>#8</sup> | 1.985(19)    |
| Sr(1)/Pb(1)-O(3) <sup>#3</sup>                                      | 2.596(9)     | Li(1)-O(2)               | 2.19(2)      |
| Sr(1)/Pb(1)-O(2) <sup>#4</sup>                                      | 2.605(7)     | Li(1)-O(1) <sup>#8</sup> | 2.19(2)      |
| Sr(1)/Pb(1)-O(1)                                                    | 2.725(7)     | B(1)-O(3)                | 1.341(14)    |
| Sr(1)/Pb(1)-O(3) <sup>#6</sup>                                      | 3.062(13)    | B(1)-O(1)                | 1.382(12)    |
|                                                                     |              | B(1)-O(2)                | 1.389(12)    |
| <b><math>\text{LiSr}_{0.583}\text{Pb}_{0.417}\text{BO}_3</math></b> |              |                          |              |
| Sr(1)/Pb(1)-O(1) <sup>#1</sup>                                      | 2.410(8)     | Li(1)-O(3)               | 1.933(19)    |
| Sr(1)/Pb(1)-O(2)                                                    | 2.497(7)     | Li(1)-O(2) <sup>#5</sup> | 1.96(2)      |
| Sr(1)/Pb(1)-O(1) <sup>#2</sup>                                      | 2.542(7)     | Li(1)-O(3) <sup>#8</sup> | 1.963(17)    |
| Sr(1)/Pb(1)-O(3) <sup>#3</sup>                                      | 2.598(8)     | Li(1)-O(2)               | 2.17(2)      |
| Sr(1)/Pb(1)-O(2) <sup>#4</sup>                                      | 2.626(8)     | Li(1)-O(1) <sup>#8</sup> | 2.219(19)    |
| Sr(1)/Pb(1)-O(1)                                                    | 2.724(7)     | B(1)-O(3)                | 1.353(14)    |

|                                                         |           |                          |           |
|---------------------------------------------------------|-----------|--------------------------|-----------|
| Sr(1)/Pb(1)-O(3) <sup>#6</sup>                          | 3.080(14) | B(1)-O(2)                | 1.381(14) |
|                                                         |           | B(1)-O(1)                | 1.381(14) |
| <b>LiSr<sub>0.5</sub>Pb<sub>0.5</sub>BO<sub>3</sub></b> |           |                          |           |
| Sr(1)/Pb(1)-O(1) <sup>#1</sup>                          | 2.381(6)  | Li(1)-O(2) <sup>#5</sup> | 1.934(15) |
| Sr(1)/Pb(1)-O(2)                                        | 2.485(6)  | Li(1)-O(3)               | 1.946(16) |
| Sr(1)/Pb(1)-O(1) <sup>#2</sup>                          | 2.543(6)  | Li(1)-O(3) <sup>#8</sup> | 1.972(16) |
| Sr(1)/Pb(1)-O(3) <sup>#3</sup>                          | 2.583(8)  | Li(1)-O(1) <sup>#8</sup> | 2.166(17) |
| Sr(1)/Pb(1)-O(2) <sup>#4</sup>                          | 2.629(6)  | Li(1)-O(2)               | 2.205(17) |
| Sr(1)/Pb(1)-O(1)                                        | 2.745(7)  | B(1)-O(3)                | 1.346(12) |
| Sr(1)/Pb(1)-O(3) <sup>#7</sup>                          | 3.084(12) | B(1)-O(2)                | 1.378(10) |
|                                                         |           | B(1)-O(1)                | 1.391(10) |

**Table S2** Atom-cutting analysis and calculated birefringence at 1064nm for  $\text{LiSrBO}_3$  and  $\text{LiSr}_{0.5}\text{Pb}_{0.5}\text{BO}_3$

| <b><math>\text{LiSrBO}_3</math></b>  |                              |                     | <b><math>\text{LiSr}_{0.5}\text{Pb}_{0.5}\text{BO}_3</math></b> |                              |                     |
|--------------------------------------|------------------------------|---------------------|-----------------------------------------------------------------|------------------------------|---------------------|
| <b>Species</b>                       | <b><math>\Delta n</math></b> | <b>Contribution</b> | <b>Species</b>                                                  | <b><math>\Delta n</math></b> | <b>Contribution</b> |
| <b><math>\text{Li}^+</math></b>      | 0.0009                       | 1.7%                | <b><math>\text{Li}^+</math></b>                                 | 0.0016                       | 2.5%                |
| <b><math>\text{Sr}^{2+}</math></b>   | 0.0059                       | 11.3%               | <b><math>\text{Sr}^{2+}</math></b>                              | 0.0020                       | 3.1%                |
| <b><math>\text{BO}_3^{3-}</math></b> | 0.0457                       | 87.0%               | <b><math>\text{Pb}^{2+}</math></b>                              | 0.0059                       | 9.3%                |
| <b>Calcd</b>                         | 0.0494                       |                     | <b><math>\text{BO}_3^{3-}</math></b>                            | 0.0544                       | 85.1%               |
|                                      |                              |                     | <b>Calcd</b>                                                    | 0.0721                       |                     |

**Figure S1** XRD patterns of calculated and experimental for crystals  $\text{LiSr}_{1-x}\text{Pb}_x\text{BO}_3$  ( $x=0.138, 0.285, 0.320, 0.379, 0.417, 0.5$ ).

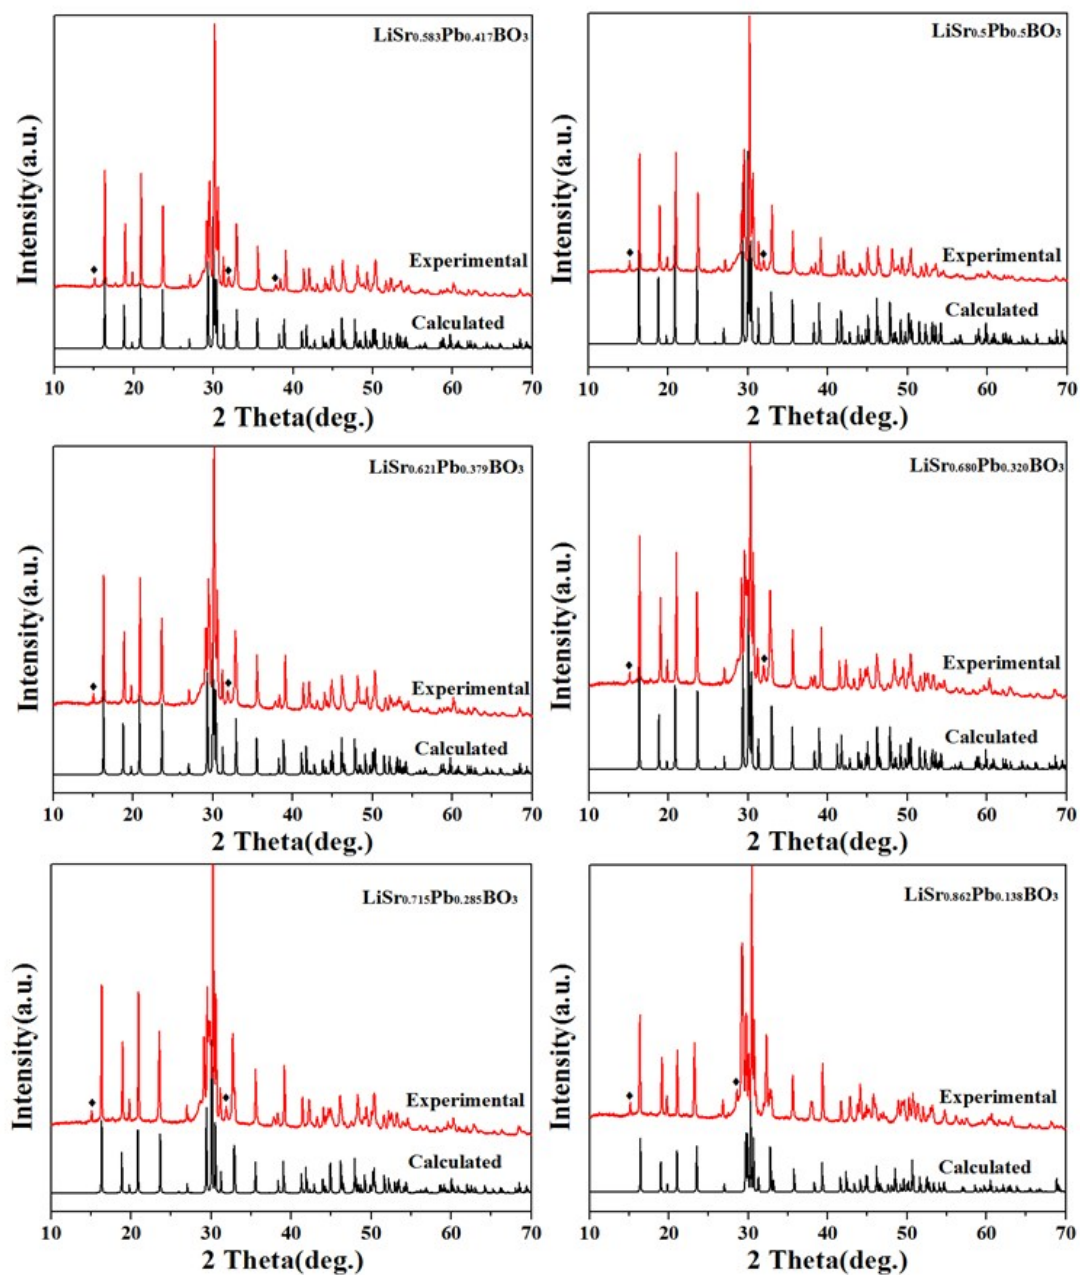

**Figure S2** The calculated birefringence of  $\text{LiSrBO}_3$  and  $\text{LiSr}_{0.5}\text{Pb}_{0.5}\text{BO}_3$

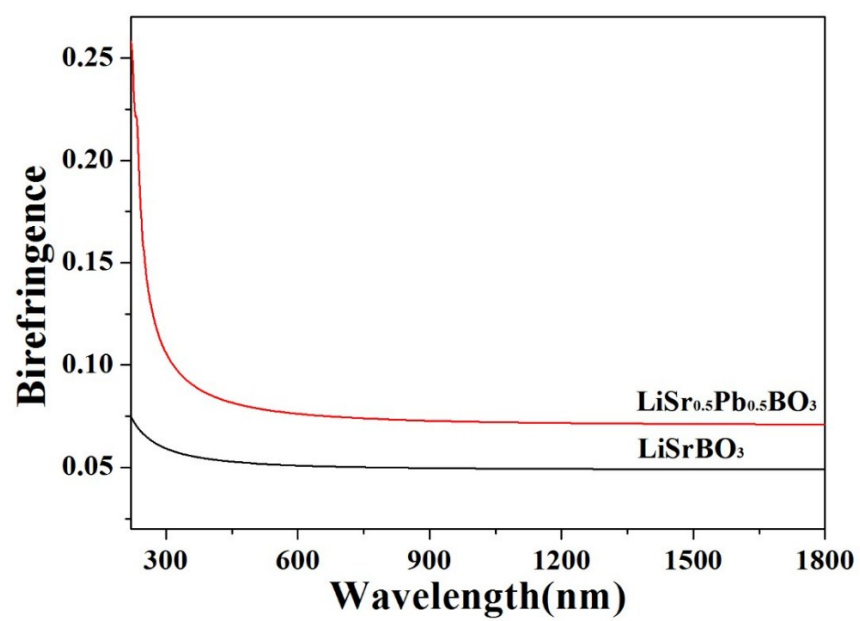

Supplement: c6nj00390g1.pdf [file c6nj00390g1.pdf]
